# Supplementary material
Source: PubMed Central journal article supplement (PMC4248701)
Supplement: EC.00163-14_zek999094358so1.pdf [file EC.00163-14_zek999094358so1.pdf]

1 Supplemental Material

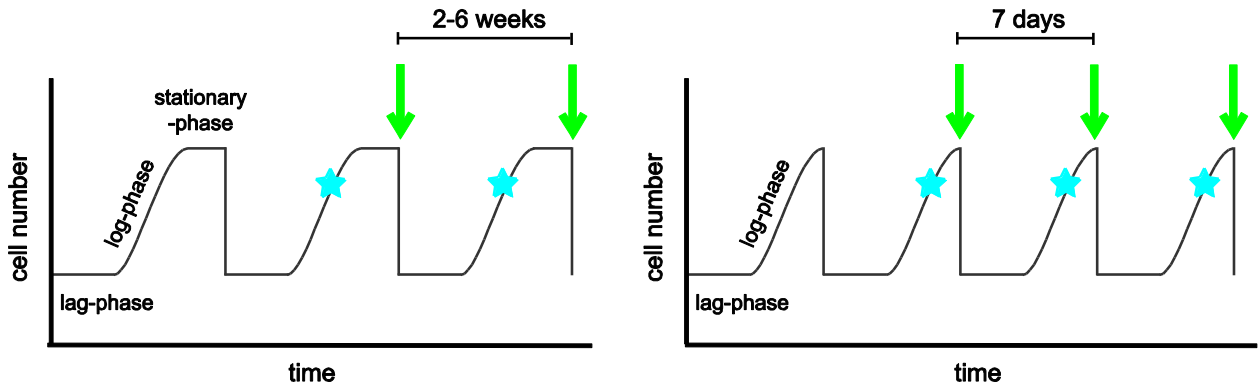

3 **Figure S1.** Culture Strategies. Arrows indicate the time point for sub-culturing, asterisks indicate  
 4 the time point (5 days after the last sub-culturing step), when experiments started. In this study  
 5 cells were kept under ‘log-phase culturing’.

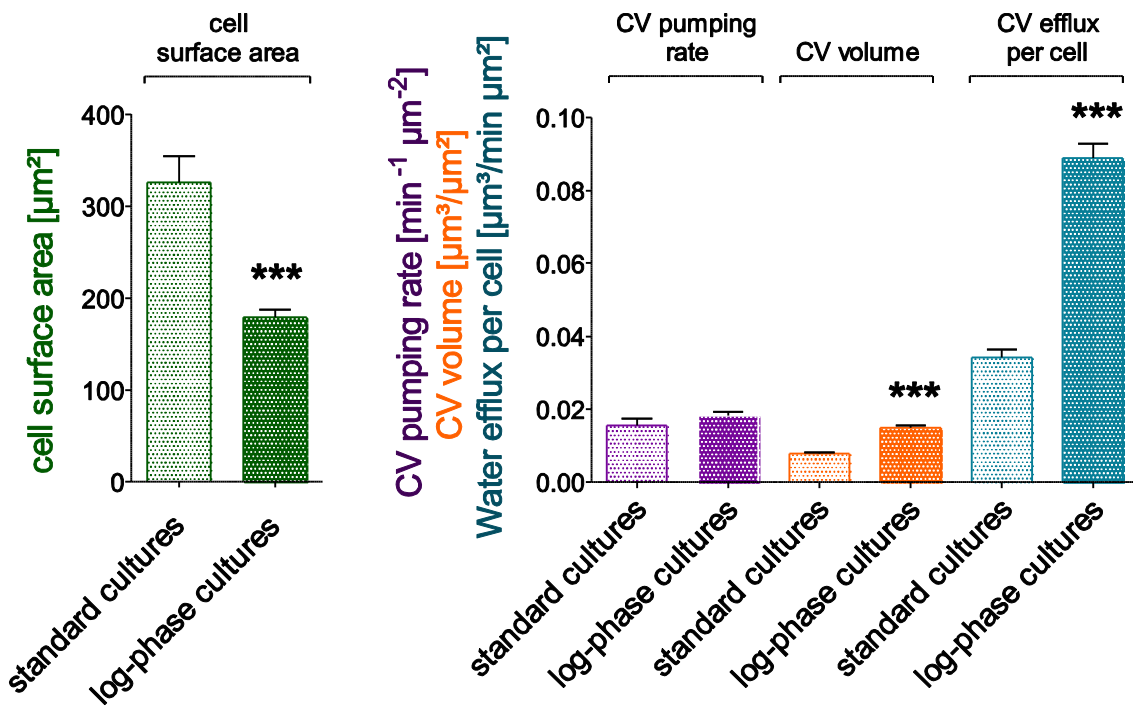

9 normalized to their cell surface area. CV pumping rate did not differ of cells of the different  
10 cultures. Strikingly, CV volume und thus CV efflux is tremendously increased in cells of ‘log-  
11 phase’ cultures.

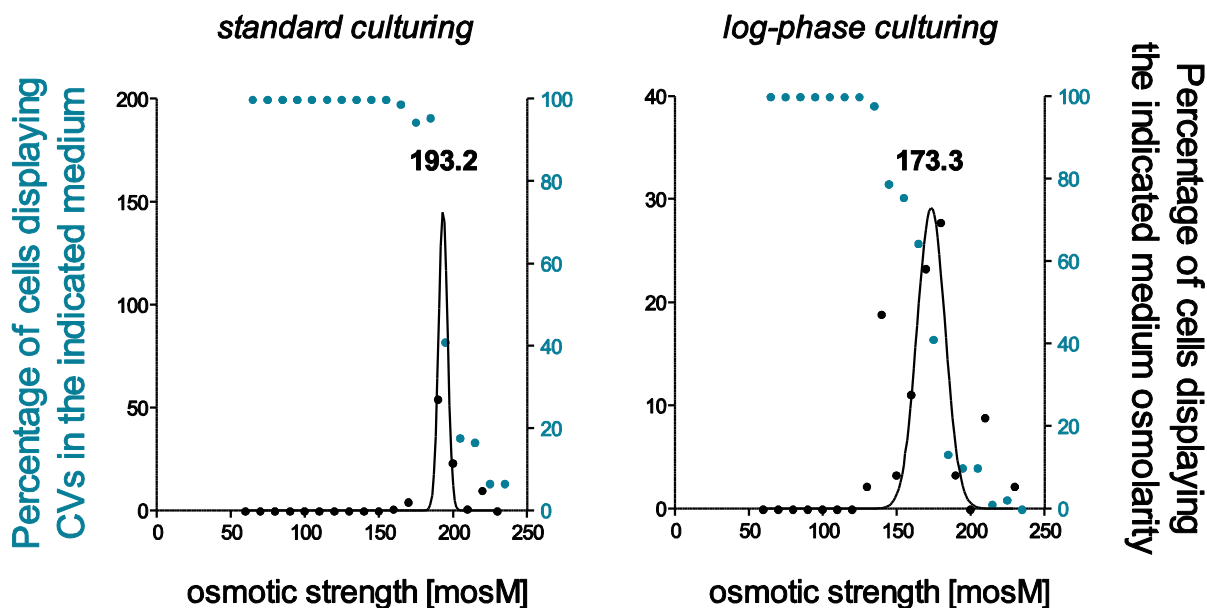

12

13 **Figure S3.** Determination of the cytosolic osmolarity of *Chlamydomonas reinhardtii* using the  
14 CV as sensor. The CVs also allow a simple determination of the cytosolic water potential. Under  
15 isotonic and hypotonic condition the CVs cease to function. *Chlamydomonas* cells were  
16 incubated with media of different osmotic strength and three times 30 cells were analyzed for the  
17 presence of light microscopically visible CVs in the cell. The mean number of CV/cell was  
18 plotted against the medium osmolarity (blue dots) and the obtained curve converted into a normal  
19 distribution of the cytosolic osmolarity (block dots). The obtained regression curve shows a  
20 maximum at 173.3 mosM. Interestingly, the cytosolic osmolarity is higher (193.2 mosM) when  
21 cells are cultured under standard conditions.

22 **Table S1.** Primers used in this study. Gene IDs are according to Phytozome 10. Primers were  
 23 designed using primer3 or manually. For each target we made sure that melting curves had single  
 24 peaks and that only one PCR product was visible on 2-4% agarose gels. Non-template controls  
 25 were generally included.

| Name            | Gene ID            | Sequence [5' to 3']      | T <sub>m</sub> [°C] |
|-----------------|--------------------|--------------------------|---------------------|
| qMIP1-3'UTR f   |                    | GCGGAGATTGACATGACTGA     | 57.3                |
| qMIP1-3'UTR r   | Cre12.g549300.t1.2 | CCCTCCACTTCCGAACACTA     | 59.4                |
| qMIP1-CDS f     |                    | CATCTTCGCGGAGTTCTTTG     | 57.3                |
| qMIP1-CDS r     |                    | GCCGTACAGGAAGATGGACA     | 59.4                |
| qMIP3 f         | Cre01.g038800.t1.2 | ACAATTCTTGCGCACGGTGA     | 57.3                |
| qMIP3 r         |                    | GCCGCTAAACCCCTTTGGTC     | 61.4                |
| qSEC6 f         | Cre17.g744847.t1.1 | TGTTCAACCGCTGCTTCCAGAC   | 62.1                |
| qSEC6 r         |                    | ACTTCTGCACCCAGTCCATCAC   | 62.1                |
| qDynamin-like f | Cre13.g569000.t1.1 | ATGTCGCGGGCTCACAGTTT     | 59.4                |
| qDynamin-like r |                    | CCCACACCACCAGTCACCAG     | 63.5                |
| qRPL34 f        | Cre16.g661050.t1.2 | ATCATTCGGGCGTTCCTCATTGAG | 62.7                |
| qRPL34 r        |                    | TGACTTCCACCGCGTTTACTTGG  | 62.4                |

26

27 **Movie S1.** Fusion protein CreMIP1-GFP localized specifically to the CVs in *Chlamydomonas*  
 28 *reinhardtii* UVM4-MIP1GFP-1. A confocal microscope (Leica TCS SP8 and a 60-fold water  
 29 immersion objective) was used for generation of this time-lapse movie. The GFP-fluorescence is  
 30 visible at the rim of the CVs. During the diastole phase the CV enlarges until systole takes place  
 31 – then the CV collapses towards the plasma membrane. However, no intermingling of the CV

32 membrane with the plasma membrane is visible. Moreover, no GFP-fluorescence signal is visible  
33 at the plasma membrane.

34
